# Supplementary material
Source: PubMed Central journal article supplement (PMC8060895)

## SUPPLEMENTAL INFORMATION

### Radiochemical synthesis and evaluation in nonhuman primates of 3-[<sup>11</sup>C]methoxy-4-aminopyridine: a novel PET tracer for K<sub>v</sub>1 channels

#### Authors

Nicolas J. Guehl<sup>1,#</sup>, Ramesh Neelamegam<sup>1,2,#</sup>, Yu-Peng Zhou<sup>1,#</sup>, Sung-Hyun Moon<sup>1</sup>, Maeva Dhaynaut<sup>1</sup>, Georges El Fakhri<sup>1</sup>, Marc D. Normandin<sup>1,\*</sup> and Pedro Brugarolas<sup>1,\*</sup>

<sup>#</sup>equal contribution

<sup>\*</sup>co-corresponding

#### Author affiliations

<sup>1</sup> Gordon Center for Medical Imaging, Department of Radiology, Massachusetts General Hospital and Harvard Medical School, Boston, MA

<sup>2</sup> Present address: Department of Radiology, The University of Texas Health Science at San Antonio, San Antonio Texas, TX

#### \* Corresponding authors:

Pedro Brugarolas, PhD

55 Fruit St., White 427

Boston, MA 02114

(617) 643-4574

[pbrugarolas@mgh.harvard.edu](mailto:pbrugarolas@mgh.harvard.edu)

Marc D. Normandin, PhD

55 Fruit St., White 427

Boston, MA 02114

(617) 643-6836

[normandin@mgh.harvard.edu](mailto:normandin@mgh.harvard.edu)

## SUPPLEMENTAL TABLES

**Supplemental table 1.** Experimental conditions and yield

| Precursor<br>( $\mu\text{mol}$ ) | NaOH<br>( $\mu\text{mol}$ ) | Solvent (300 $\mu\text{L}$ ) | Water<br>( $\mu\text{L}$ ) | Temp<br>( $^{\circ}\text{C}$ ) | Time<br>(min) | RCC*<br>(%)                                          |
|----------------------------------|-----------------------------|------------------------------|----------------------------|--------------------------------|---------------|------------------------------------------------------|
| 18                               | 1.5                         | DMF:DMSO (1:2)               | 3                          | RT                             | 3             | 13                                                   |
| 18                               | 3                           | DMF:DMSO (1:2)               | 3                          | RT                             | 3             | 29 $\pm$ 2<br>(n = 4)                                |
| 18                               | 25                          | DMF:DMSO (1:2)               | 3                          | 80                             | 1             | 40 $\pm$ 17<br>(n = 3)                               |
| 18                               | 25                          | DMSO                         | 3                          | RT                             | 3             | 33                                                   |
| 18                               | 35<br>(KOH)                 | DMSO                         | -                          | 80                             | 1             | 80 $\pm$ 8<br>(n = 3)                                |
| 18                               | 24                          | DMSO                         | -                          | 80                             | 3             | 42                                                   |
| <b>18</b>                        | <b>24</b>                   | <b>DMSO</b>                  | <b>4</b>                   | <b>80</b>                      | <b>3</b>      | <b>35 <math>\pm</math> 7%</b><br><b>(n = 4)</b>      |
| <b>18</b>                        | <b>75</b>                   | <b>DMSO</b>                  | <b>0</b>                   | <b>80</b>                      | <b>3</b>      | <b>42%</b><br><b>(n = 1)</b>                         |
| <b>18</b>                        | <b>32</b>                   | <b>DMSO</b>                  | <b>4</b>                   | <b>80</b>                      | <b>3</b>      | <b>14 <math>\pm</math> 3%</b><br><b>(RCY, n = 3)</b> |

\* Calculated from radioHPLC chromatogram of reaction mixture

**SUPPLEMENTAL FIGURES**

**Supplemental Figure 1.** Radiochromatograms of plasma (PL) samples obtained at different times post injection from a representative study.

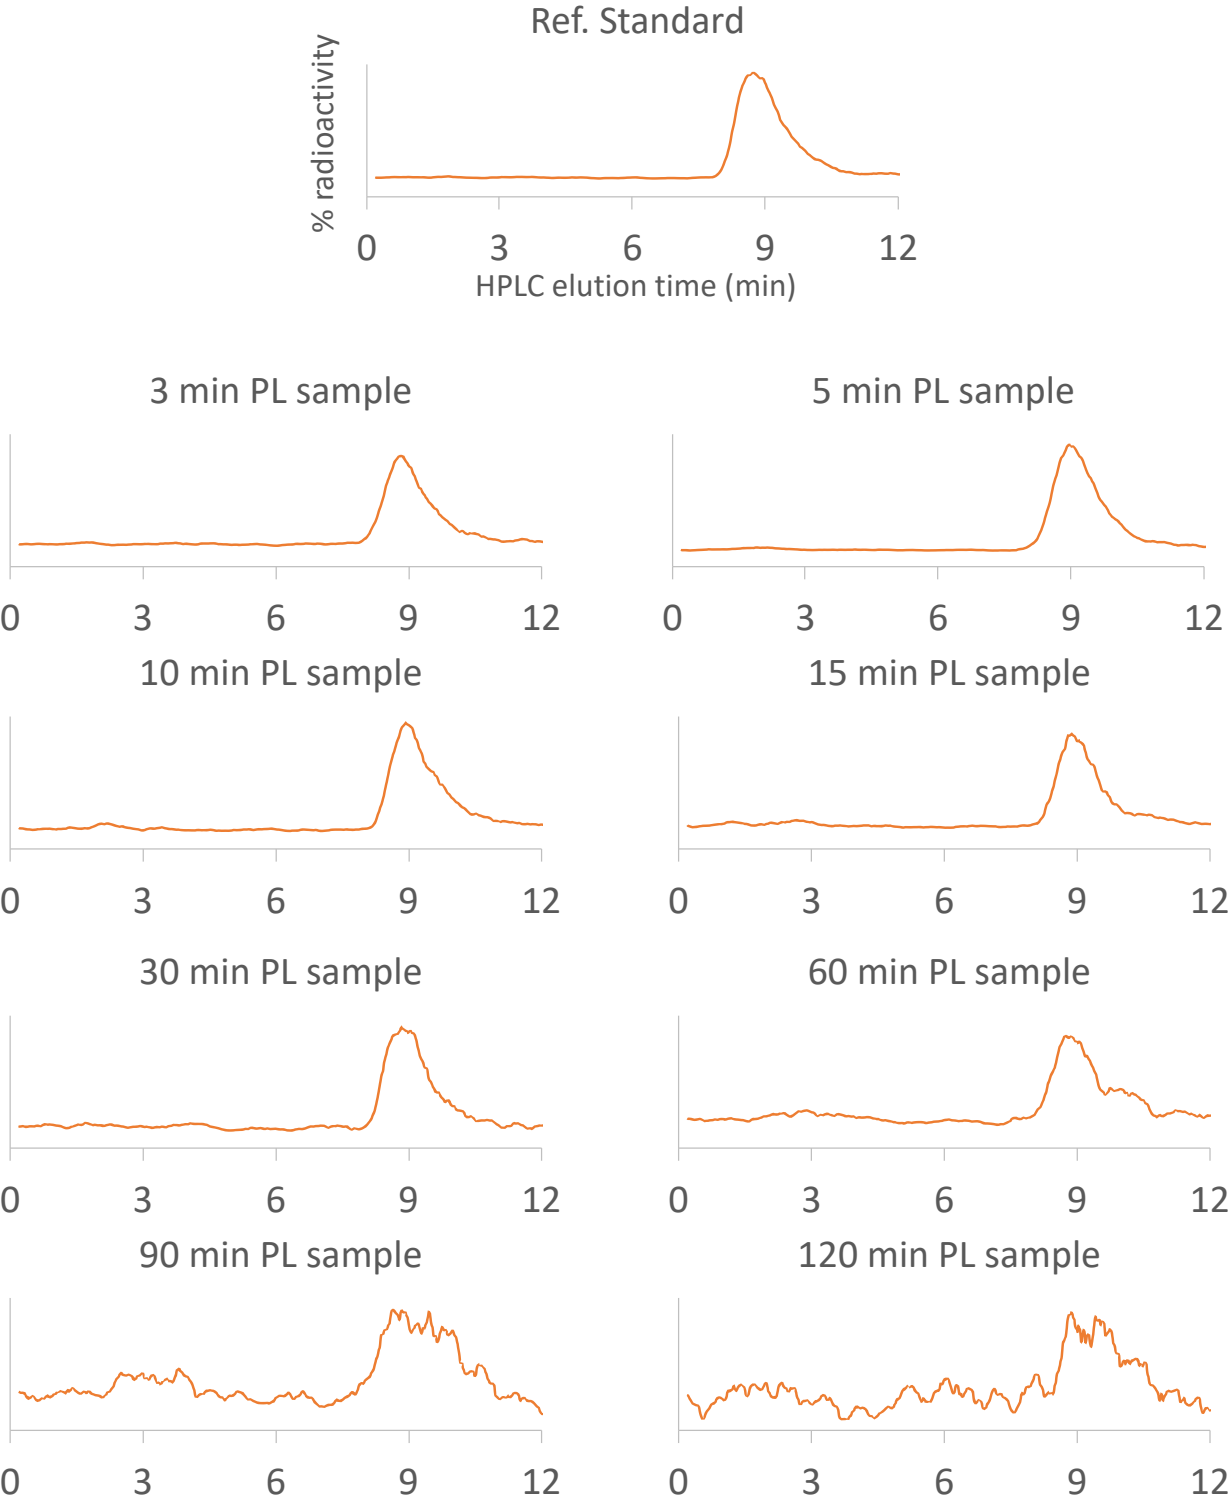

Supplement: NIHMS1682623-supplement-supplemental.pdf [file NIHMS1682623-supplement-supplemental.pdf]
